# Supplementary material for: Endothelial colony forming cells and mesenchymal progenitor cells form blood vessels and increase blood flow in ischemic muscle
Source: PubMed Central journal article supplement (PMC5429692; doi:10.1038/s41598-017-00809-1), 2017-04-10
Supplement: 41598_2017_809_MOESM1_ESM.pdf [file 41598_2017_809_MOESM1_ESM.pdf]

**Supplementary Figures 1-4 and Table 1 for:**

**Endothelial colony forming cells and mesenchymal progenitor cells form blood vessels and  
increase blood flow in ischemic muscle**

Authors: Kyu-Tae Kang, Ruei-Zeng Lin, David Kuppermann, Juan M. Melero-Martin,  
Joyce Bischoff

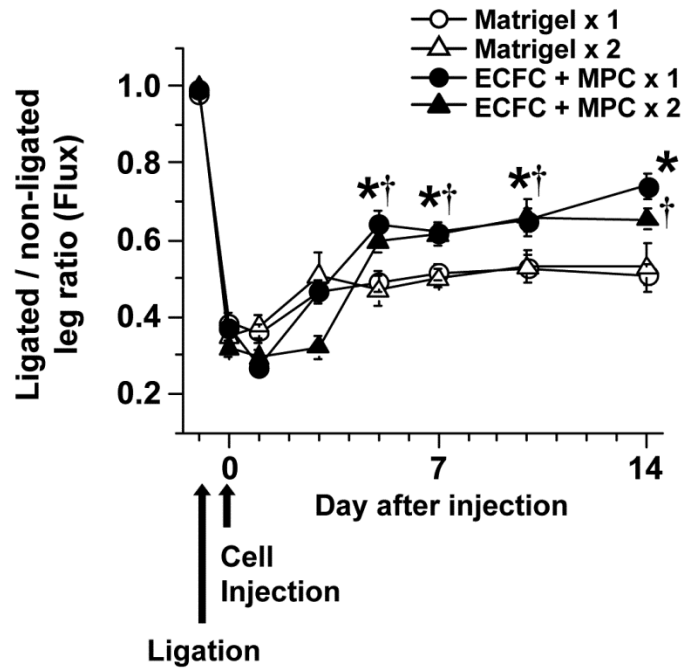

**Supplementary Figure 1. Blood flow recovery over 14 days: murine ischemic hind limbs treated with x1 and x2 human ECFC+MPC.** Hind limb ischemia was induced by the ligation and cutting of femoral artery and vein at day -1. After confirmation of diminished blood flow at day 0, Matrigel, ECFC, MPC, or ECFC+MPC were injected. Injected cell number was total  $2 \times 10^6$  cells suspended in 50  $\mu$ L of ice-cold Phenol Red-free Matrigel. The ratio of ECFC:MPC was 2:3. In another experiment, the number of ECFC+MPC injected was increased two-fold by performing a second injection of  $2 \times 10^6$  cells suspended in 50  $\mu$ L of ice-cold Phenol Red-free Matrigel to investigate whether increased ECFC+MPC cell number would increase or accelerate blood flow recovery, measured by the Laser Doppler imager. Quantified graph of blood flow is presented by the ligated/non-ligated leg ratio (n=6-15; means  $\pm$  SEM.) to compare between x1 and x2 ECFC+MPC injection versus x1 and x2 Matrigel injection. \* Significant difference ( $P \leq 0.05$ ) between x1 ECFC+MPC and x1 Matrigel. † Significant difference ( $P \leq 0.05$ ) between x2 ECFC+MPC and x2 Matrigel.

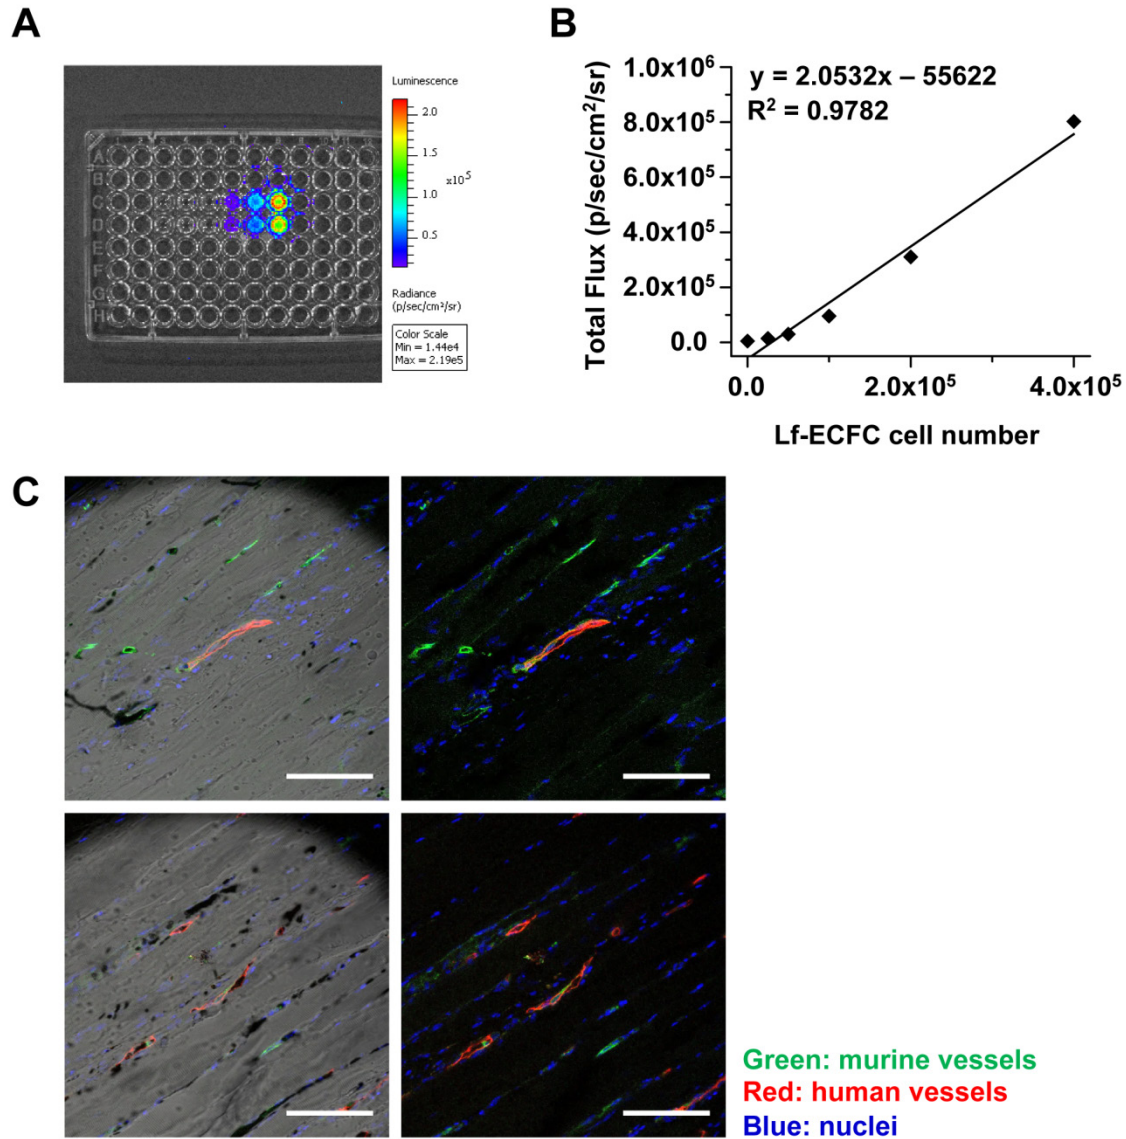

**Supplementary Figure 2. Correlation between luciferase-ECFC and bioluminescence signal**

Luciferase-expressing ECFC were grown, counted, and lysed. Serially diluted lysates were pipetted onto the 96 well plate. Luciferin was added to each well (final concentration = 140  $\mu\text{g}/\mu\text{L}$ ). **(A)** Representative bioluminescent signal that was detected for 2 min using an IVIS 200 Imaging System (Xenogen Corporation). **(B)** Collected data were analyzed with Live Image 3.0 (Xenogen Corporation) and plotted against input Lf-ECFC cell number. **(C)** Representative confocal images show that human microvessels formed by ECFC+MPC are present in-between ischemic hind limb muscle fibers (Scale bars represents 100  $\mu\text{m}$ ).

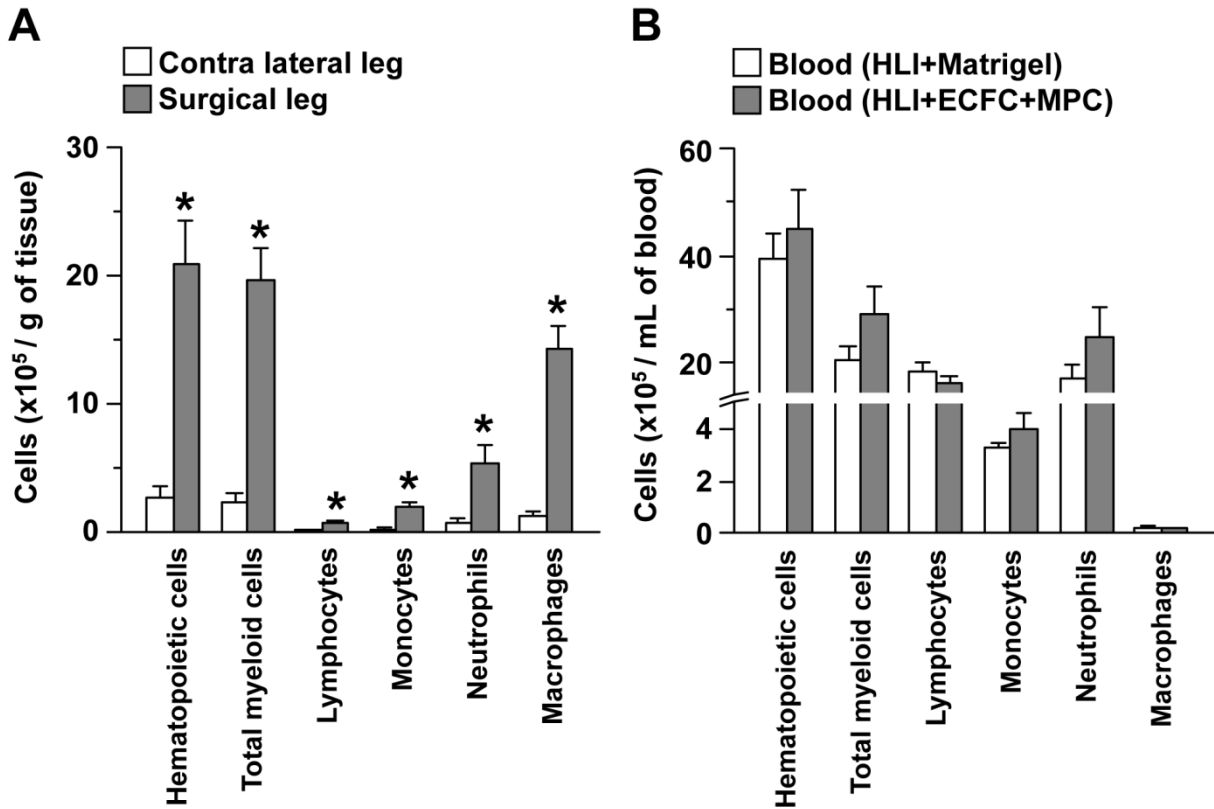

**Supplementary Figure 3. Flow cytometric analysis of the myeloid cells in the ischemic hind limb muscle or peripheral blood** (A) Hind limb muscle was obtained 2 days after femoral artery/vein ligation, without any cell injection. Flow cytometric analysis was performed to determine if the recruitment of myeloid lineage cells is dependent on the ischemic condition. CD45<sup>+</sup> hematopoietic cells, CD11b<sup>-</sup> lymphocytes, CD11b<sup>+</sup> myeloid cells and myeloid lineage cells including Ly-6G<sup>+</sup> neutrophils, F4/80<sup>low+</sup> monocytes, and F4/80<sup>high+</sup> macrophages were increased in the ischemic hind limb muscles compared to contralateral hind limb muscles at day 2. \* Significant difference ( $P \leq 0.05$ ) between groups. (B) In another experiment, peripheral blood was obtained 2 days after Matrigel or ECFC+MPC injection in the ischemic hind limb. CD45<sup>+</sup> hematopoietic cells, CD11b<sup>-</sup> lymphocytes, CD11b<sup>+</sup> myeloid cells and myeloid lineage cells including Ly-6G<sup>+</sup> neutrophils, F4/80<sup>low+</sup> monocytes, and F4/80<sup>high+</sup> macrophages were similar between Matrigel and ECFC+MPC.

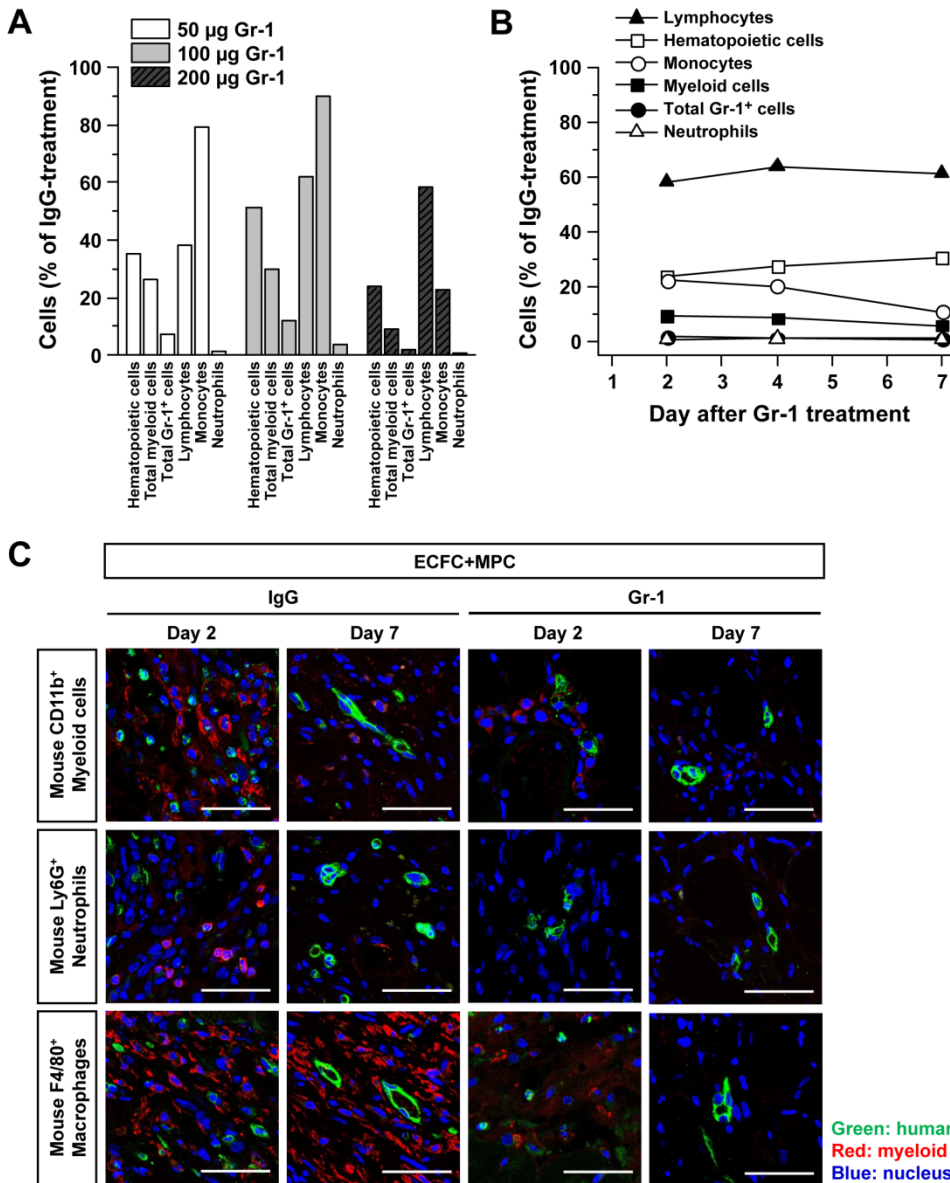

**Supplementary Figure 4. Gr-1 antibody depletion of myeloid lineage cells** Gr-1 antibody or control IgG antibody was administered intraperitoneally at a concentration of 50, 100, or 200  $\mu\text{g}$  per mouse. Myeloid lineage cells in the blood and hind limb muscles were analyzed using flow cytometry after two days. **(A)** CD45<sup>+</sup> hematopoietic cells, CD11b<sup>-</sup> lymphocytes, CD11b<sup>+</sup> myeloid cells, and myeloid lineage cells including Ly-6G<sup>+</sup> neutrophils, F4/80<sup>low+</sup> monocytes, and F4/80<sup>high+</sup> macrophages, presented as a percent of control IgG antibody treated-blood sample, were reduced in a dose-dependent manner (n=2). **(B)** Administration of 200  $\mu\text{g}$  of Gr-1 antibody every 2 days showed the continuous suppression of myeloid lineage cells in the ischemic hind limb muscles for 7 days. **(C)** Representative confocal images of myeloid cells in the ischemic hind limb muscles injected by ECFC+MPC with IgG or Gr-1 treatment at day 2 and 7 (Scale bars represents 50  $\mu\text{m}$ ).

**Supplementary Table 1. Absolute cell number of engrafted ECFC and MPC within ischemic hind limb muscles (associated with Figures 2D and 3I)**

| Fig.2D | ECFC        |             |             | MPC          |              |             |
|--------|-------------|-------------|-------------|--------------|--------------|-------------|
|        | Day 0       | Day 2       | Day 7       | Day 0        | Day 2        | Day 7       |
| Cell # | 8.00 ± 0.00 | 0.84 ± 0.27 | 0.28 ± 0.08 | 12.00 ± 0.00 | 10.49 ± 3.42 | 1.78 ± 0.21 |

| Fig. 3I | Treatment | ECFC        |             |             | MPC          |             |             |
|---------|-----------|-------------|-------------|-------------|--------------|-------------|-------------|
|         |           | Day 0       | Day 2       | Day 7       | Day 0        | Day 2       | Day 7       |
| Cell #  | IgG       | 8.00 ± 0.00 | 0.97 ± 0.05 | 0.29 ± 0.02 | 12.00 ± 0.00 | 2.10 ± 0.11 | 1.15 ± 0.35 |
| Cell #  | Anti-Gr-1 | 8.00 ± 0.00 | 0.36 ± 0.06 | 0.02 ± 0.00 | 12.00 ± 0.00 | 0.60 ± 0.03 | 0.16 ± 0.04 |

Each cell number presents mean ± SEM ( $\times 10^5$ ) from whole hind limb muscle tissue. Cell number on Day 0 is the injected cell number for ECFC and MPC.
